# Supplementary material
Source: PubMed Central journal article supplement (PMC3059417)
Supplement: mmc1.pdf [file mmc1.pdf]

## Supplemental Data

### Autosomal-Recessive Posterior Microphthalmos

#### Is Caused by Mutations in *PRSS56*,

#### a Gene Encoding a Trypsin-Like Serine Protease

Andreas Gal, Isabella Rau, Leila El Matri, Hans-Jürgen Kreienkamp, Susanne Fehr, Karim Baklouti, Ibtissem Chouchane, Yun Li, Monika Rehbein, Josefine Fuchs, Hans C. Fledelius, Kaj Vilhelmsen, Daniel F. Schorderet, Francis L. Munier, Elsebet Ostergaard, Debra A. Thompson, and Thomas Rosenberg

**Table S1. Single Nucleotide Polymorphisms (SNPs) Used to Map *PRSS56* in Two Faroese Families with Posterior Microphthalmos**

| Physical Location | Gene          | Exon/Intron | Nucleotide changed | Alleles | SNP ID            | Heterozygosity |
|-------------------|---------------|-------------|--------------------|---------|-------------------|----------------|
| 232260537         | <i>B3GNT7</i> | Intron 1    | c.11+12            | G/T     | <i>rs4972989</i>  | n. d.          |
| 232326417         | <i>NCL</i>    | Exon 3      | c.447              | A/G     | <i>rs1131171</i>  | 0.486          |
| 233244930         | <i>ALPP</i>   | Exon 6      | c.692              | G/C     | <i>rs1048988</i>  | 0.197          |
| 233347919         | <i>ECEL1</i>  | Intron 8    | c.1507-30          | G/C     | <i>rs6750085</i>  | 0.500          |
| 233537125         | <i>EFHD1</i>  | Exon 3      | c.557              | G/A     | <i>rs11550699</i> | 0.460          |
| 233633460         | <i>KCNJ13</i> | Exon 3      | c.524              | T/C     | <i>rs1801251</i>  | 0.407          |

n.d., no data.

**Table S2. Position and Size of *PRSS56* Exons and Sequence of Primers Used for PCR Amplification Thereof**

| Exon | Position<br>(ATG = c.1 – c.3;<br>TGA = c.1810 – c.1812) | Size (bp) |          | Sequence (5'-3') of primers                                  |
|------|---------------------------------------------------------|-----------|----------|--------------------------------------------------------------|
|      |                                                         | Exon      | Amplicon |                                                              |
| 1    | c.-136 – c.97                                           | 233       | 421      | TCCTAGGAGTTAAGGGCCAGGTG (F)<br>AGGAGCCAAAGGTCCTTATGAGTG (R)  |
| 2    | c.98 – c.205                                            | 108       | 216      | AACCACGCATGATTGTGTGCC (F)<br>AAGGGACAGAGGCAGCAGAATGG (R)     |
| 3    | c.206 – c.256                                           | 51        | 1147     | AGCAGTGAGACTCAAAGGTCTG (F)<br>TCCCTACACTCTATTACCTCGGAC (R)   |
| 4    | c.257 – c.446                                           | 190       |          |                                                              |
| 5    | c.447 – c.546                                           | 100       |          |                                                              |
| 6    | c.547 – c.706                                           | 160       |          |                                                              |
| 7    | c.707 – c.849                                           | 143       | 334      | AATGCTGCCTGCTCTTTCAAAGG (F)<br>AGACAGACGTGGAAGGAAAAGAG (R)   |
| 8    | c.850 – c.1012                                          | 163       | 1084     | AGGCGTAAGGCAGGCGTCATAGG (F)<br>AAGCGCTTCCGACCTCGTCCAG (R)    |
| 9    | c.1013 – c.1186                                         | 174       |          |                                                              |
| 10   | c.1187 – c.1351                                         | 165       |          |                                                              |
| 11   | c.1352 – c.1414                                         | 63        |          |                                                              |
| 12   | c.1415 – c.1521                                         | 107       | 233      | AGGCCATCCTGAGGTGCTGGTGG (F)<br>AGGCCATCGTGAAGGAGTCTGGAAG (R) |
| 13   | c.1522 – c.2022                                         | 501       | 451      | TCTGGGGTTTCAACTCAGGAGTG (F)<br>AGCCACTGGGGCAGCGACAGTTG (R)   |

**Table S3. Size of Amplicons and Sequence of Primers Used to Evaluate *PRSS56* Expression in Human and *Prss56* Expression in Mouse Eyes following Amplification of cDNA by Reverse Transcriptase-Coupled PCR**

| Gene transcript               | Size (bp) | Sequence (5'-3') of primers |
|-------------------------------|-----------|-----------------------------|
| human <i>PRSS56</i> forward   | 416       | TCGCACGAGTGCCGAGGATCT       |
| human <i>PRSS56</i> reverse   |           | CTCACCGGCGTCCACAGCTG        |
| mouse <i>Prss56</i> forward_1 | 442       | TTGCTTCGCCGGTGCCTCGAATG     |
| mouse <i>Prss56</i> reverse_1 |           | ACAGGTAAAGGGCCCCCGGA        |
| mouse <i>Prss56</i> forward_2 | 354/411*  | GGCATCCACTGTACACGCGC        |
| mouse <i>Prss56</i> reverse_2 |           | ATTGCTTCGCCGGTGCCTCGAA      |
| human <i>HPRT</i> forward     | 249       | ACCCACGAAGTGTTGGATA         |
| human <i>HPRT</i> reverse     |           | AAGCAGATGGCCACAGAACT        |
| mouse <i>Hprt</i> forward     | 227       | GCAAGCTTGCTGGTGAAAAGGAC     |
| mouse <i>Hprt</i> reverse     |           | GGCAACATCAACAGGACTCCTCGTA   |

\*Using the second mouse primer combination, two apparent splice variants were detected; the longer variant differs from the database entry (XM\_487606.5) as it includes an exon of 57 bases, coding for 19 additional amino acids. These residues are positioned between the signal peptide cleavage site, and the predicted proteolytic activation site of the mouse protein. In fact, the database entry for the human *PRSS56* mRNA also contains this exon. The sequence of the longer cDNA variant has been submitted to Genbank (accession number JF323950).

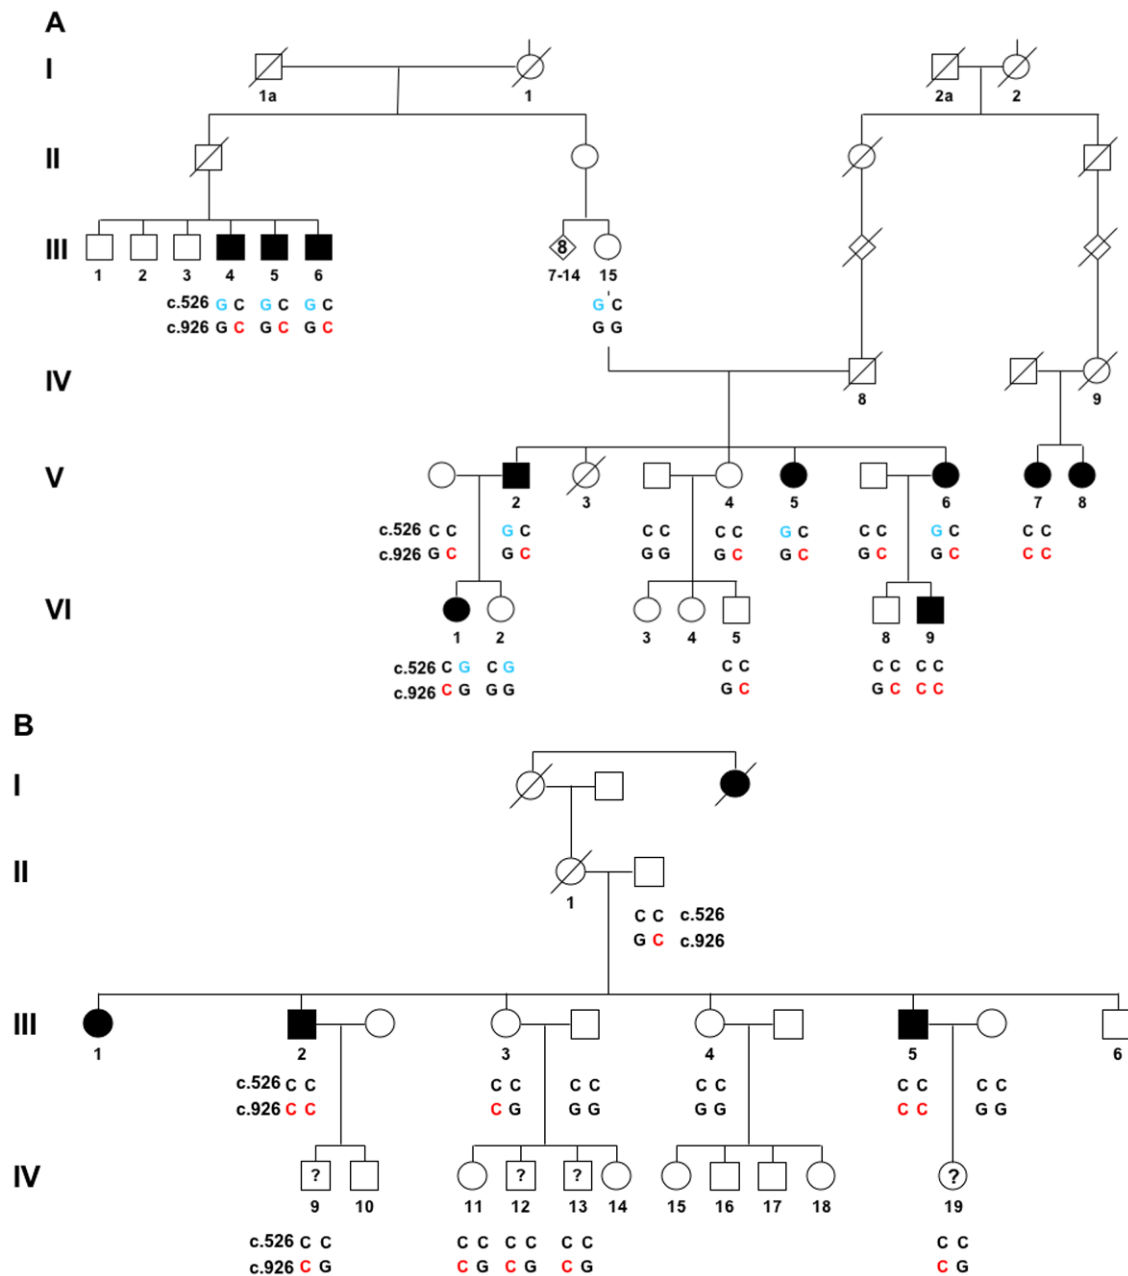

**Figure S1. Pedigrees of Two Large Families with arMCOP from the Faroe Islands**  
 Families HOP00201 (A) and HOP00202 were published by Fuchs *et al.*<sup>1</sup> as Families 1 and 2, respectively. Generation and individual numbers shown in the figure are the same as in the original paper. Genotypes for nucleotides c.526 (exon 5; first line) and c.926 (exon 8; second line) of *PRSS56* are shown below the corresponding pedigree symbols, with the mutant nucleotide in color. ?: MCOP phenotype is not defined due to young age.

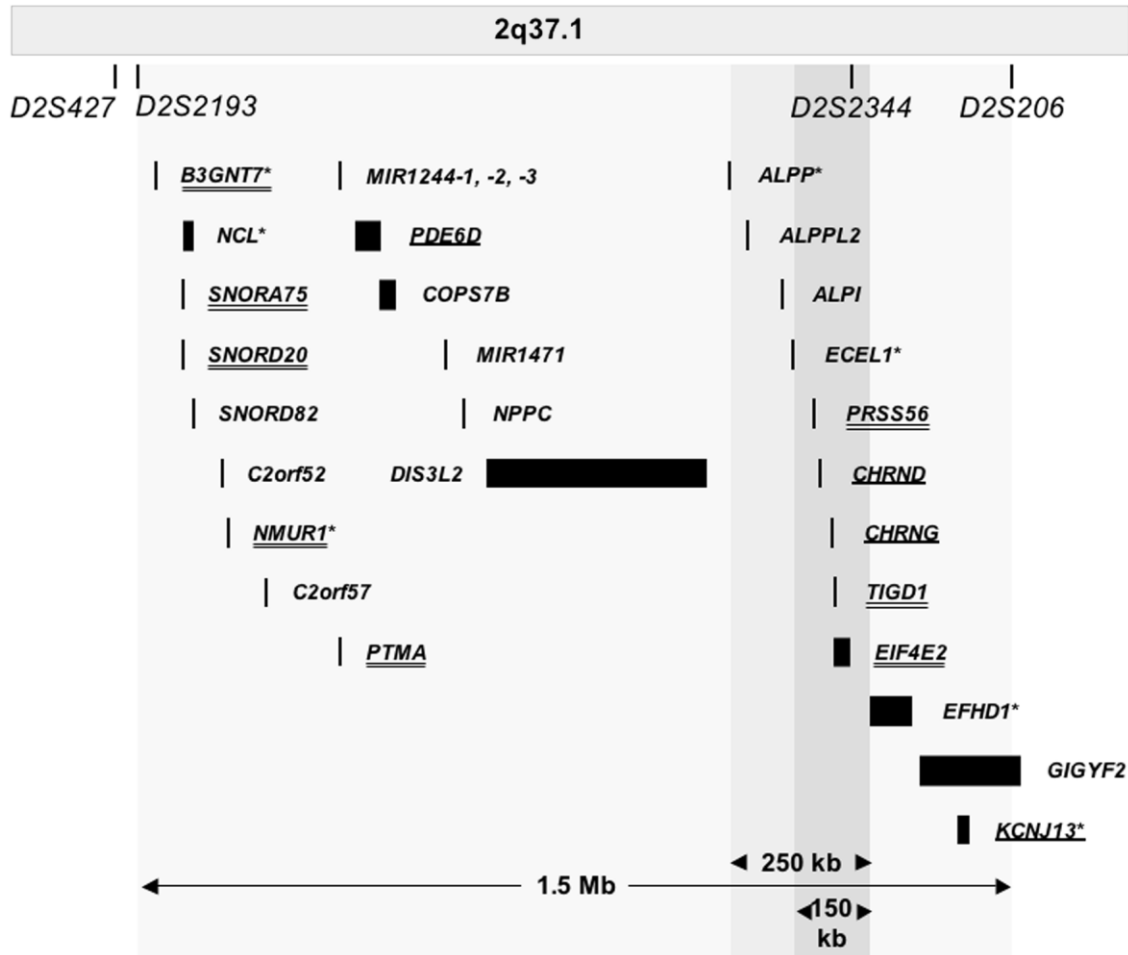

**Figure S2. Physical Map and Relative Position of the Genes Mapped in the 1.5 Mb Genomic Region Defined to Harbour the *PRSS56* Gene by Linkage Analysis**

Candidate genes excluded by missing co-segregation of SNP alleles with the disease phenotype are marked by asterisk. Genes sequenced in this study (double underlined) or by Hmani-Aifa et al.<sup>2</sup> (underlined) are also shown. For more details see text.
